# Supplementary material for: Margin Accentuation Irreversible Electroporation in Stage III Pancreatic Cancer: A Systematic Review
Source: MDPI journal article supplement (doi:10.3390/cancers13133212), 2021-06-27
Supplement: s1 [file s1]

# Supplementary Materials: Margin Accentuation Irreversible Electroporation in Stage III Pancreatic Cancer: A Systematic Review

Bathiya Ratnayake, Dhya Al-Leswas, Ghazaleh Mohammadi-Zaniani, Peter Littler, Gourab Sen, Derek Manas and Sanjay Pandanaboyana

**Table S1.** Methodological items for non-randomized studies criteria (MINORS) scores among all domains for all included studies.

| Methodological items for non-randomized studies      | Martin et al (2012) [1] | Martin et al (2013) [2] | Kwon et al (2014) [3] | Dunki-Jacobs et al (2014) [4] | Martin et al (2015) [5] | Kluger et al (2016) [6] | Marsanic et al (2017) [7] | Kluger et al (2018) [8] |
|------------------------------------------------------|-------------------------|-------------------------|-----------------------|-------------------------------|-------------------------|-------------------------|---------------------------|-------------------------|
| A clearly stated aim                                 | 2                       | 1                       | 2                     | 2                             | 1                       | 2                       | 1                         | 2                       |
| Inclusion of consecutive patients                    | 2                       | 2                       | 2                     | 2                             | 1                       | 2                       | 1                         | 2                       |
| Prospective collection of data                       | 2                       | 1                       | 1                     | 1                             | 1                       | 1                       | 1                         | 2                       |
| Endpoints appropriate to the aim of the study        | 2                       | 2                       | 2                     | 2                             | 1                       | 2                       | 1                         | 2                       |
| Unbiased assessment of the study endpoint            | 1                       | 1                       | 2                     | 2                             | 0                       | 1                       | 0                         | 2                       |
| Follow-up period appropriate to the aim of the study | 2                       | 1                       | 2                     | 2                             | 1                       | 1                       | 1                         | 1                       |
| Loss to follow up less than 5%                       | 2                       | 1                       | 2                     | 2                             | 2                       | 2                       | 2                         | 2                       |
| Prospective calculation of the study size            | 0                       | 0                       | 0                     | 0                             | 0                       | 0                       | 0                         | 0                       |
| Additional criteria for comparative study            |                         |                         |                       |                               |                         |                         |                           |                         |
| An adequate control group                            | -                       | 0                       | -                     | -                             | 0                       | 0                       | -                         | -                       |
| Contemporary groups                                  | -                       | 0                       | -                     | -                             | 0                       | 0                       | -                         | -                       |
| Baseline equivalence of groups                       | -                       | 0                       | -                     | -                             | 0                       | 0                       | -                         | -                       |
| Adequate statistical analyses                        | -                       | 0                       | -                     | -                             | 0                       | 0                       | -                         | -                       |
| Total                                                | 11                      | 9                       | 13                    | 13                            | 7                       | 11                      | 7                         | 13                      |

## Reference

- Martin, R.C.; McFarland, K.; Ellis, S.; Velanovich, V. Irreversible Electroporation Therapy in the Management of Locally Advanced Pancreatic Adenocarcinoma. *J. Am. Coll. Surg.* **2012**, *215*, 361–369, doi:10.1016/j.jamcollsurg.2012.05.021.
- Martin, R.C.G.; McFarland, K.; Ellis, S.; Velanovich, V. Irreversible Electroporation in Locally Advanced Pancreatic Cancer: Potential Improved Overall Survival. *Ann. Surg. Oncol.* **2012**, *20*, 443–449, doi:10.1245/s10434-012-2736-1.
- Kwon, D.; McFarland, K.; Velanovich, V.; Martin, R.C. Borderline and locally advanced pancreatic adenocarcinoma margin accentuation with intraoperative irreversible electroporation. *Surg.* **2014**, *156*, 910–922, doi:10.1016/j.surg.2014.06.058.
- Dunki-Jacobs, E.M.; Philips, P.; Martin, R.C. Evaluation of Resistance as a Measure of Successful Tumor Ablation During Irreversible Electroporation of the Pancreas. *J. Am. Coll. Surg.* **2014**, *218*, 179–187, doi:10.1016/j.jamcollsurg.2013.10.013.
- Martin, R.C.G.; Kwon, D.; Chalikonda, S.; Sellers, M.; Kotz, E.; Scoggins, C.; McMasters, K.M.; Watkins, K. Treatment of 200 Locally Advanced (Stage III) Pancreatic Adenocarcinoma Patients With Irreversible Electroporation. *Ann. Surg.* **2015**, *262*, 486–494, doi:10.1097/sla.0000000000001441.
- Kluger, M.D.; Epelboym, I.; Schroepe, B.A.; Mahendraraj, K.; Hecht, E.M.; Susman, J.; Weintraub, J.L.; Chabot, J.A. Single-Institution Experience with Irreversible Electroporation for T4 Pancreatic Cancer: First 50 Patients. *Ann. Surg. Oncol.* **2015**, *23*, 1736–1743, doi:10.1245/s10434-015-5034-x.
- Marsanic, P.; Mellano, A.; Sottile, A.; De Simone, M. Irreversible electroporation as treatment of locally advanced and as margin accentuation in borderline resectable pancreatic adenocarcinoma. *Med Biol. Eng. Comput.* **2017**, *55*, 1123–1127, doi:10.1007/s11517-016-1603-9.
- Kluger, M.D.; Rashid, M.F.; Rosario, V.L.; Schroepe, B.A.; Steinman, J.A.; Hecht, E.M.; Chabot, J.A. Resection of Locally Advanced Pancreatic Cancer without Regression of Arterial Encasement After Modern-Era Neoadjuvant Therapy. *J. Gastrointest. Surg.* **2018**, *22*, 235–241, doi:10.1007/s11605-017-3556-1.
